# Supplementary material
Source: HighWire-hosted journal article supplement (http://www.qdcxjkg.com/highwire/filestream/113606/field_highwire_adjunct_files/6/patient_info_-_tests_conducted_in_tb_clinics_-_tamil.pdf)
Supplement: patient_info_-_tests_conducted_in_tb_clinics_-_tamil.pdf [file patient_info_-_tests_conducted_in_tb_clinics_-_tamil.pdf]

# கசரோகம் (TB) கிளினிக்குகளில் நடத்தப்படும் சோதனைகள்

Patient information:  
HIV testing in TB clinics (Tamil)

## மார்பு எக்ஸ்-ரே (X-ray)

உங்களுக்கு சுவாசப் பையில் கசரோகம் உள்ளதா என பரிசோதிக்க இந்த சோதனை நடத்தப்படும். உங்களுக்கு அளிக்கப்பட்ட சிகிச்சை பலன் தருகிறதா என பரிசோதிக்க பின்னர் மீண்டும் செய்யப்படலாம்.

## மார்புச் சளி பரிசோதனை (Sputum/ phlegm test)

உங்களுடைய சுவாசப் பையில் கசரோகம் இருக்கிறதா என்பதைப் பரிசோதிக்க உங்களை சளியின் மாதிரிகள் தரும்படி கேட்கப்படலாம். உங்களுக்கு அளிக்கப்பட்ட சிகிச்சை பலன் தருகிறதா எனப் பரிசோதிக்க பின்னர் மீண்டும் திருப்பி இந்தச் சோதனை செய்யப்படலாம்.

## இரத்தப் பரிசோதனைகள்

இரத்தப் பரிசோதனைகள் உங்களுக்கு இரத்தச் சோகை நோய் இருக்கின்றதா என்பதைக் காட்ட முடியும். அல்லது உங்கள் உடலில் ஏதாவது தொற்றுதல் ஏற்பட்டு உள்ளதா என்பதைக் காட்ட உதவும். இந்தச் சோதனைகளை சிகிச்சை ஆரம்பித்த பின்பு திருப்பிச் செய்வதன் மூலம் தொற்றுதல் நீங்கிச் செல்கின்றதா என்பதை எங்களுக்கு தெரியப்படுத்துதல்.

மற்றைய பரிசோதனைகள் உங்களுடைய ஈரலும் சிறுநீரகமும் சிகிச்சைக்கு முன்பும் பின்பும் எவ்வாறு செயற்படுகின்றது என்பதை நாங்கள் அறிவதற்காக மேற்கொள்ளப்படுகின்றது. இந்த சோதனைகள் அவசியம் ஏனெனில் உங்களது சில வகையான மருந்துகள் உங்களுடைய சிறுநீரகத்தினதும் ஈரலினதும் தொழிற்பாட்டைப் பாதிக்கலாம்.

## ஏனைய தொற்றுதல்களுக்கான சோதனைகள்

கசரோக கிளிநிக்குக்கு செல்லும் ஒவ்வொருவருக்கும் HIV (எச்ஐவி) சோதனை ஒன்றை நாங்கள் வழங்குவோம். HIV ஆனது உடலின் நோய் எதிர்ப்பு தொகுதியை பாதிக்கும். ஆகவே கசரோகம் இலகுவாக தொற்றி அவ்வாறே நின்று கொள்ளும். HIVக்கு தற்பொழுது நல்ல சிகிச்சை உள்ளது. அது உங்கள் உடல் நலத்தை முன்னேற்ற உதவும்.

## ஏனைய தொற்றுதல்களுக்கான சோதனைகள்

நாங்கள் உங்களுக்கு ஹெப்பற்றிற்றிஸ் B (hepatitis B) மற்றும் ஹெப்பற்றிற்றிஸ் C (hepatitis C) தொற்றுதல்கள் ஏற்பட்டு உள்ளதா எனவும் உங்களைச் சோதிக்கலாம். இந்த தொற்றுதல்கள் உங்கள் ஈரல் செயற்படும் முறையை மாற்றலாம் அத்துடன் உங்கள் கசரோக சிகிச்சையைப் பாதிக்கலாம். உங்களுடைய சோதனை சாதகமாக இருந்தால் உங்களை விசேட நிபுணர்களின் குழுவுக்கு பரிந்து உரைக்கலாம்.

## இரகசியத் தன்மை

உங்களுக்கு மேற்கொண்ட அனைத்து சோதனைகளின் முடிவுகளும் இரகசியமாக கருதப்படும். அத்துடன் தகவல்கள் உங்கள் பராமரிப்பில் நேரடியாக ஈடுபட்டு உள்ள ஆரோக்கிய பராமரிப்பு உத்தியோகத்தர்களுக்கு மட்டும் தெரியப்படுத்தப்படும்.

## மேலதிக தகவல்

### HIV (எச்ஐவி)

NAHIP: [www.nahip.org.uk](http://www.nahip.org.uk)

Do It Right:

[www.doitright.uk.com](http://www.doitright.uk.com)

THT: [www.tht.org.uk](http://www.tht.org.uk)

### TB (கசரோகம்)

NKS TB:

[www.hpa.org.uk/tbknowledge](http://www.hpa.org.uk/tbknowledge)

TB Alert: [www.tbalert.org](http://www.tbalert.org)

### Other useful sites

(ஏனைய பயன் உள்ள தளங்கள்)

NHS choices: [www.nhs.uk](http://www.nhs.uk)

Health Protection Agency:

[www.hpa.org.uk](http://www.hpa.org.uk)
